# Supplementary material for: Groundwater Level Forecasting with Artificial Neural Networks: AComparison of LSTM, CNN and NARX
Source: Copernicus journal article supplement (doi:10.5194/hess-2020-552), 2020-11-23
Supplement: Supplementary file [file hess-2020-552-AC1-supplement.pdf]

# Answer to Referee #1 regarding the interactive comment on “Groundwater Level Forecasting with Artificial Neural Networks: A Comparison of LSTM, CNN and NARX” by Andreas Wunsch et al.

Received and published: 23 December 2020

We thank Reviewer #1 for the useful suggestions and comments. We think that these really helped to improve the quality of the manuscript. We are glad to read that our manuscript is already honest and well written and that its findings are interesting and novel. We answer each of the comments in the following in red.

We have already revised the manuscript, because the discussion is still open, we will upload the revised pdf in a few days.

## 1 General Comments

The manuscript sets out to compare the groundwater level forecasts of three different data-driven model classes. Interestingly, they find that the simplest model (NARX) outperforms the more complicated models in almost all settings. And, it exhibits at least competitive performance over the entire testing battery. Overall, the manuscript is honest and well written; the experiments all appear carefully executed; and the findings are both interesting and novel. I would therefore recommend accepting the contribution. I do however suggest major changes. Simply, because I believe that the manuscript does not fully exhaust its potential. And, I do believe that with a few – but crucial – changes the paper can be improved greatly.

Thank you.

## 2 Specific Comments

**Framing.** The authors present their research as a comparative study between different model classes. In reality, it is a reflection upon the data-dependency of empirical modelling. In the current version of the manuscript this second version is somewhat concealed. It does not appear in the abstract and introduction, and only slowly emerges in the discussion of the manuscript. I would recommend emphasizing it from the start to the end. It is closer to the underlying theme. More importantly, however, it connects the study with an important branch of environmental/empirical modelling research. Loosely speaking, the task of figuring out how much data is warranted for a given setup (for a classical reference I suggest Jakeman and Hornberger; 1993 – for a more modern flavour I would like to recommend Gauch, Mai and Lin; 2021). And, goes even further by connecting it to a common thread of machine learning literature, which attributes parts of the recent success to the availability of large-scale datasets (see for example Halevy, Norvig and Pereira; 2009). The discussion and conclusions of the current version suggests to me that the authors are aware of this “data-scarcity” theme. For some reasons they did however not commit fully to it. A reframing would not require new experiments, but would give the manuscript more clarity, while also enriching the scholarly depth of the manuscript.

Thank you for this very useful comment. We admit that this deserves definitely more attention in the manuscript. We therefore established a new section (2.6) and modified many small parts of the text to make this aspect more present in the manuscript.

See changes in Lines: 11, 16, 68-69, new Section 2.6 (lines 211ff.), 382, 414-415, 420-421,

**Showing.** The manuscript should contain more summary tables and explanatory depictions to guide the readers. This is not to say that information is lacking. No. A lot of information is provided throughout the manuscript! It is just distributed over the entire text and some summary tables and figures are provided in the supplement. That is already useful. However, the supplement has itself 80 pages and serves a different purpose. I am thinking more about some kind of guide/help for readers in the style of Figure 1 (Page 6). In the following I provide some examples. They are supposed to exhibit the “form of exposition” that I am thinking about. I’d like to emphasize that they are however neither exhaustive nor imperative. My hope is that they inspire the authors to provide more clarity.

- A table with the different model setups. This would make it easier for readers to keep an overview.

Done. We combine this suggestion with your suggestion to show conceptual depictions of the different models (Fig. 1).

- A set of graphs that shows the training/calibration development of the different models. This would allow readers to see if and how the model converged. Maybe that is something for an Appendix.

Done. We provide these figures now in the electronic supplement (Figures S72 to S141).

- An overview map of the basin-locations. This would provide an intuition about the scope of the study.

Done (Fig.3).

- A table with the different input parameters and their relation to the models. This would be a convenient look back while the results and discussion section.

We are not quite sure what you mean. Input parameters are mentioned on every graphic showing any groundwater forecast. A summary for all models can be found in the supplement, but would be overwhelming for the main part of the text.

- A conceptual depiction of the different models. This would be helpful to make a distinction between the models (and setups) clearer. It should probably not be super technical but illustrate the conceptual differences.

Done. See above (Fig. 1).

- A depiction which shows the data-availability of the different hydrographs. This would provide readers with an intuition about the actual length of the data. How many started in 1967? How many in 1994? What is their distribution?

Done (Fig.3).

**Naming.** I do not agree with many of the introduced terminology conventions of the manuscript. I did stumble upon some of the used conventions, and believe that other readers will too. Some adaptations could avoid this and make the manuscript more clearer. Concretely:

1. **NARX.** A nonlinear autoregressive exogenous model (NARX) can be seen as an extension of the ARIMA style time-series models (see for example Box and Jenkins; 2011) . This means that we can define a NARX using the equation  $y_t = f(y_{t-1}, \dots, y_{t-M}, x_t, \dots, x_{t-N}) + \epsilon_t$ , where  $t$  is the time-index,  $y$  is the regressand and  $x$  constitutes the additional exogenous variables, and  $f(\cdot)$  is our nonlinear linking function. The NARX setting does not necessitate the use of a specific linking function. As a matter of fact, all of the presented approaches –the shallow network, the CNN and the LSTM – can be used as non-linear components. All approaches can be used in a normal regression setting (where past estimations or measurements of the regressand is not provided to the model); an auto-regression setting (where past estimation or measurements are provided to the model); as well the presented open-loop, and closed-loop settings. I therefore think the chosen terminology (which contrasts NARX with CNNs and LSTMs) can be difficult to understand for many readers.

To be clearer in contrasting the models we now describe the NARX model more detailed and also as a recurrent multi-layer perceptron. We hope this prevents misunderstanding. See beginning of (Section 2.2, Lines 89-92.)

2. **Coefficient of Determination.** The equation for the coefficient of determination ( $R^2$ , equation 2) is actually the square of Pearson's correlation coefficient (note:  $r^2$ ). The two statistical coefficients only correspond to each other in the simple linear-regression setting (and even there only post-hoc model fit). Clearly not the setting of the study. I see several possible fixes. 1. Renaming it. 2. Renaming and decapitalizing it. Reporting Pearson's correlation coefficient instead. Regarding point 3. I admit it is the most laborious solution and eyeballing the results I would assume that it will not change much in practise. It is however the solution I would prefer, since it is closer to general scientific practise, and has the theoretical advantage that negative correlations are exposed instead of mapped back to a positive value.

You are right, we corrected the naming to squared Pearson  $r$ , because indeed we calculated it this way. However, we disagree that this value does not equal the coefficient of determination because we do not compare the model inputs and outputs but the model output (simulated GWL) to the observed GWL. This of course is a linear model because we basically compare the same variables and in the best case on equals the other. The simplification of Pearson  $r^2 = R^2$  Coeff. of. Det. is therefore true. See lines 189 and 198-199.

3. **Sequence-to-value.** I was not able to figure out the difference between the terms "sequence-to-value" and "sequence-to-one". If the underlying settings are the same I would recommend to use the more common terminology (to give a comparison: A search on google scholar revealed around 4,400 results for the query "sequence to one", but only 38 for "sequence to value").

You are right, sequence to one is the more common term in a direct comparison. Also, other terms like "one step ahead", "many to one" ore "many to many" in case of seq2seq are commonly used. As it is an important publication in this area of research, we refer to Kratzert et al. (2019), who use the term sequence to value, like we did. We therefore choose to not change to naming, however, we wanted to address your comment anyway and we added some explanations to the text. See line 62

Lastly, I would like to reemphasize the already existing quality of the study. I just see much potential for improvements.

### 3 Technical Corrections

I do not have many technical corrections since the paper as such is well written.

- L.32ff. I would love to have some more references to the usage of the compared models in environmental research. We have added some references to recent DL models in water resources. (See Lines. 38-39.) We think that covering all environmental research would be overwhelming.
- L. 121ff. I miss references/sources for the CNNs (and their development).  
Done. Line 132
- Figure description of Figure 1. The text starts without capitalization and the provided description is insufficient.  
Done. Now Fig. 2, Line 178
- L.280. The title capitalization is used differently from the remainder of the manuscript, which seems to follow an American English style.  
Done.

#### 4 References

- Box, G. E., Jenkins, G. M., Reinsel, G. C. (2011). Time series analysis: forecasting and control. Vol. 734. John Wiley Sons.
- Gauch, M., Mai, J., Lin, J. (2021). The proper care and feeding of CAMELS: How limited training data affects streamflow prediction. Environmental Modelling Software, Volume 135, 2021, 104926, ISSN 1364-8152.
- Haykin, S. (1999). Neural networks: a comprehensive foundation. Prentice-Hall, Inc..
- Jakeman, A. J., Hornberger, G. M. (1993). How much complexity is warranted in a rainfall-AR runoff model? Water resources research, 29(8), 2637-2649.
- Halevy, A., Norvig, P., Pereira, F. (2009). The unreasonable effectiveness of data. IEEE Intelligent Systems, 24(2), 8-12.

Kratzert, F., Klotz, D., Shalev, G., Klambauer, G., Hochreiter, S. and Nearing, G.: Towards learning universal, regional, and local hydrological behaviors via machine learning applied to large-sample datasets, Hydrol. Earth Syst. Sci., 23(12), 5089–5110, <https://doi.org/10/gghmz4>, 2019.
